# Supplementary material for: Hunk/Mak-v is a negative regulator of intestinal cell proliferation
Source: PubMed Central journal article supplement (PMC4367870; doi:10.1186/s12885-015-1087-2), 2015-03-08

## Mitosis in adenoma

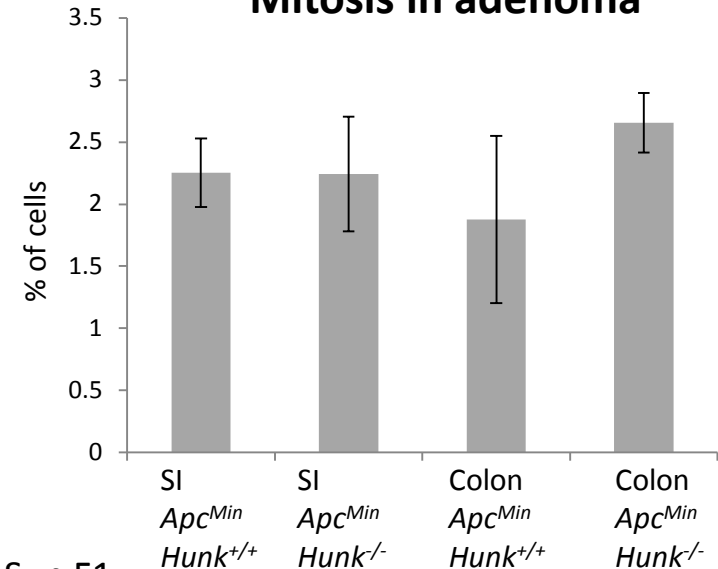

## Apoptosis in adenoma

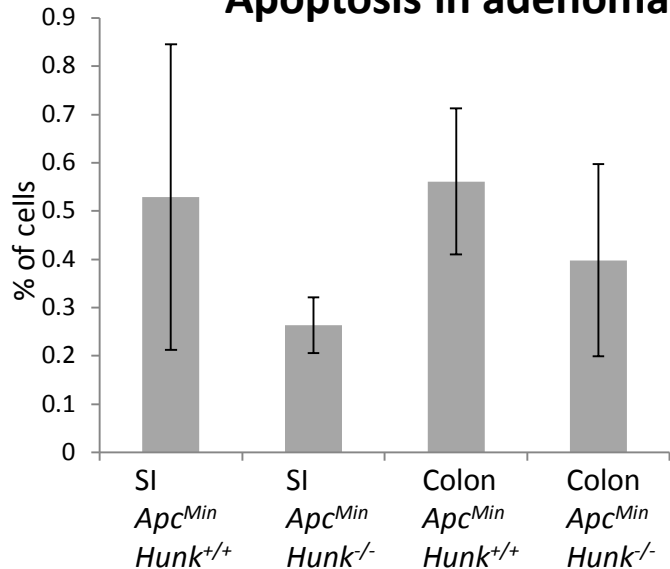

Supplement: 12885_2015_1087_MOESM1_ESM.pdf [file 12885_2015_1087_MOESM1_ESM.pdf]
